# Supplementary material
Source: publisher site journal article supplement (https://www.dovepress.com/article/205383)
Supplement: Supplementary file 1 [file get_supplementary_file.php]

Supplementary (S).

**Participant questionnaire SCGH, Ethics approval, Protocol No 2015-106**

**Date_________**

Participant ID __________ Name ___________ _______________________________Gender____________

Date of Birth __________ Address_______________________________ __________Place of Birth ­­­­­­­­­_______

Exclusion criteria (symptoms): Yes No Frequency

Do you have burning, pain, discomfort or pressure in your bladder? _____ ____ ________

Do you need to urinate with little warning? _____ ____ ________

Do you urinate frequently during the day? _____ ____ ________

Do you get up at night to urinate? _____ ____ ________

Do you leak? _____ ____ ________

Bladder incomplete emptying? _____ ____ ________

Do you have hematuria (blood in urine)? _____ ____ ________

Exclusion criteria (history):

Do you have a medical history of lower urinary tract pain? _____ ____ _______

Do you have a medical history of lower urinary tract inflammation? _____ ____ _______

Do you have a medical history of lower urinary tract infection? _____ ____ _______

Do you have a medical history of Interstitial Cystitis? _____ ____ _______

Do you have a medical history of Pelvic Inflammatory Disease? _____ _____ _______

Do you have a medical history of Endometriosis? _____ _____ _______

Do you have medical history of Prostatitis? _____ _____ _______

Do you have medical history of Irritable Bowel Syndrome?

Do you have a medical history of prolapse? _____ _____ ________

Do you have medical history of fibromyalgia? _____ _____ ________

Do you have medical history of chronic pelvic problems or trauma? _____ _____ ________

**Participant questionnaire UWA, ETHICs approval, Protocol No RA/4/1/8317**

Title of Project: **URINARY BLADDER WALL MEASUREMENTS IN 120 HEALTHY VOLUNTEERS USING MODERN HIGH FREQUENCY ULTRASOUND**

*Interstitial cystitis is a chronic, seriously debilitating condition characterised by bladder wall inflammation. The cause of this disease is yet to be determined. This study will help us better understand the differences in urinary microbiota between healthy people, and people with interstitial cystitis. Results may pave the way to establishing the mechanisms by which the disease arises in the human bladder.*

**PARTICIPANT NAME: ____________________________________________________**

**PARTICIPANT AGE: ______________________________________________________**

**PARTICIPANT SEX (M/F): _________________________________________________**

**PARTICIPANT ETHNICITY (optional): ________________________________________**

**TO BE ELIGIBLE FOR THIS STUDY YOU MUST:**

1. Be between the age 19 and 79
2. Have no burning, pain, discomfort or pressure in the bladder
3. Have no frequent urination with little warning
4. Have no haematuria (blood in urine)
5. Have no bladder leakage
6. Have no incomplete emptying of the bladder

**EXCLUSION CRITERIA:**

1. Medical history of the upper and/or lower urinary tract pain, inflammation, infection
2. Have used or been prescribed antibiotics in the last two weeks

**PLEASE COMPLETE THE FOLLOWING DETAILS:**

**Yes No Unsure**

**Have you had, or do you have:**

A history of urinary tract pain, inflammation, or infection
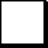

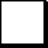

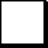


Frequency of urination (i.e. >10 times a day)
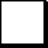

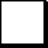

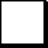


Urinary urgency (a sudden, strong urge to urinate)
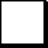

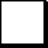

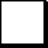


Pain, discomfort or pressure when passing urine
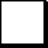

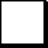

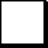


Pelvic inflammatory disease
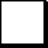

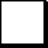

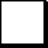


Chronic pelvic problems, trauma, surgery or prolapse
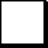

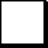

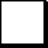


Any other disorder of the upper or lower urinary tract
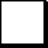

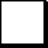

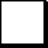


Endometriosis (if you are female)
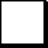

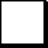

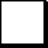


Prostatitis (if you are male)
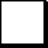

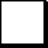

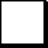


Irritable Bowel Syndrome
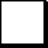

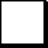

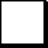


Fibromyalgia
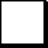

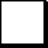

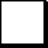


Irritable Bowel Syndrome
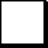

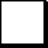

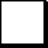


Diabetes
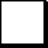

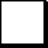

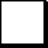


Frequency of urination (i.e. >10 times a day)
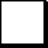

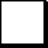

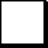


Vascular problems (specifically in the legs)
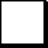

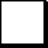

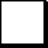


Overall, do consider yourself currently in good health?
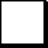

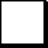

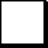


**Have you taken any medicines in the past month, specifically antibiotics?**

Yes
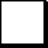
 No
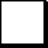


If yes, please give details for each. If you are not sure, please ask us to help;

| **Medicine** | **What is it for?** | **Dose** | **Frequency** | **Date of last dose** |
| --- | --- | --- | --- | --- |
|  |  |  |  |  |
|  |  |  |  |  |
|  |  |  |  |  |
|  |  |  |  |  |
|  |  |  |  |  |

**Confidentiality:** The information given on this form will be treated as confidential. The information will not be copied and will be destroyed if a subject is not selected for the study. Only the researchers involved will have access to this data.

**Thank you for providing this information**. **We remind you that you can opt out of the study at any time you like. Your sample and information will be subsequently destroyed.**

Table S1M: Group Average Data – Male Control Groups

Table S1F: Group Average Data – Female Control Groups

Fig. S1: Bladder Wall Thickness versus Age (Males)

Fig. S2: Bladder Wall Thickness versus Age (Females)

Fig. S3: Detrusor Thickness versus Bladder Volume (Males)

Fig. S4: Detrusor Thickness versus Bladder Volume (Females)

Fig. S5: 2D SWV versus Bladder Volume (Males)

Fig. S6: 2D SWV versus Bladder Volume (Females)

Fig. S7: Resistive Index versus Bladder Volume (Males)

Fig. S8: Resistive Index versus Bladder Volume (Females)
